# Supplementary material for: Corticosteroids impair epithelial regeneration in immune-mediated intestinal damage
Source: PubMed Central journal article supplement (PMC10977993; doi:10.1172/jci155880), 2024-02-13

Full unedited gel  
for Figure 6A

Proteins detected:  
p-STAT3  
STAT3  
GAPDH

\*\*Bands used in  
figure

Lane #:  
1: Untreated  
2: rmlL-22  
3: MP  
4L rmlL-22 & MP

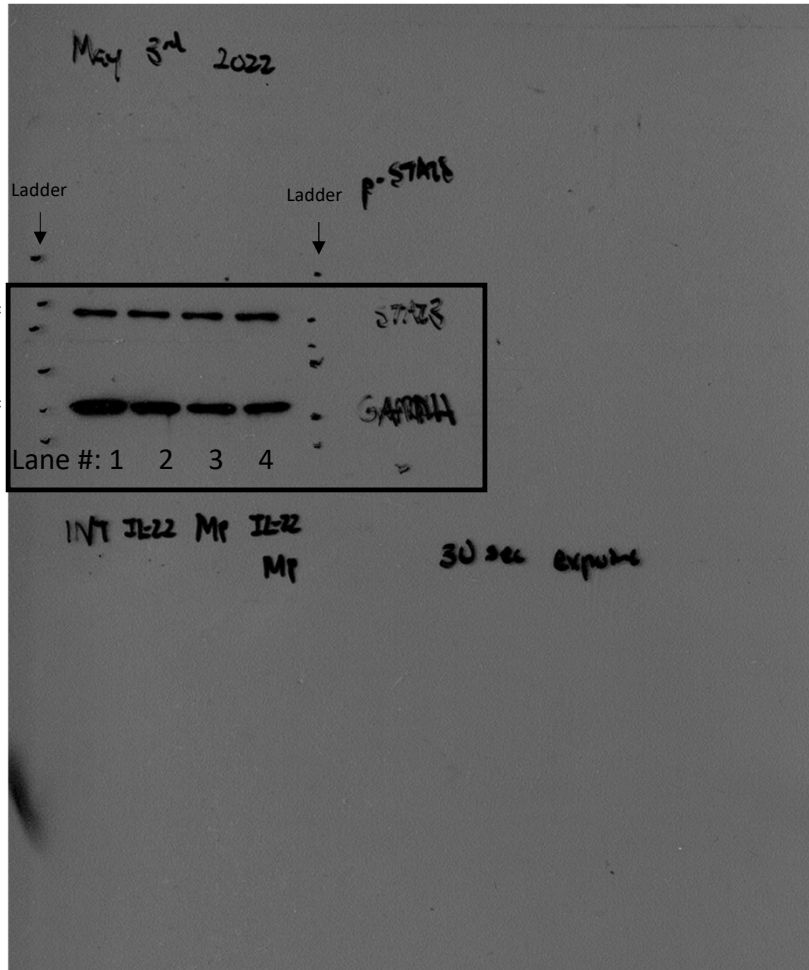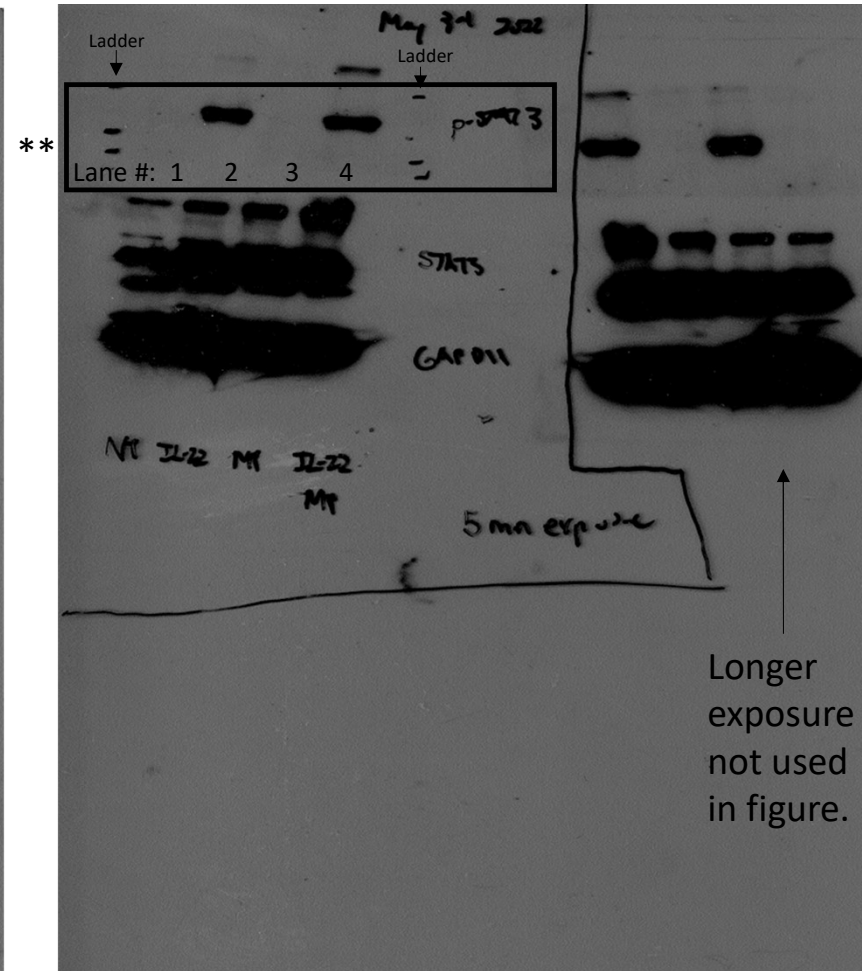

Supplement: jci-134-155880-s106.pdf [file jci-134-155880-s106.pdf]
