# Supplementary material for: Corticosteroids impair epithelial regeneration in immune-mediated intestinal damage
Source: JCI journal article supplement (doi:10.1172/jci155880), 2024-02-13
Supplement: sd1 [file 1]

Supplementary Figures for

**Corticosteroids impair epithelial regeneration in immune-mediated intestinal damage.**

Viktor Arnhold, Winston Y. Chang, Suze A. Jansen, Govindarajan Thangavelu, Marco Calafiore, Paola Vinci, Ya-Yuan Fu, Takahiro Ito, Shuichiro Takashima, Anastasiya Egorova, Jason Kuttiyara, Adam Perlstein, Marliek van Hoesel, Chen Liu, Bruce R. Blazar, Caroline A. Lindemans, Alan M. Hanash

Correspondence to:

Alan M. Hanash  
hanasha@mskcc.org  
1275 York Ave.  
New York, NY 10065  
P: 646-888-3437  
F: 646-422-0298

## Supplemental Figure 1

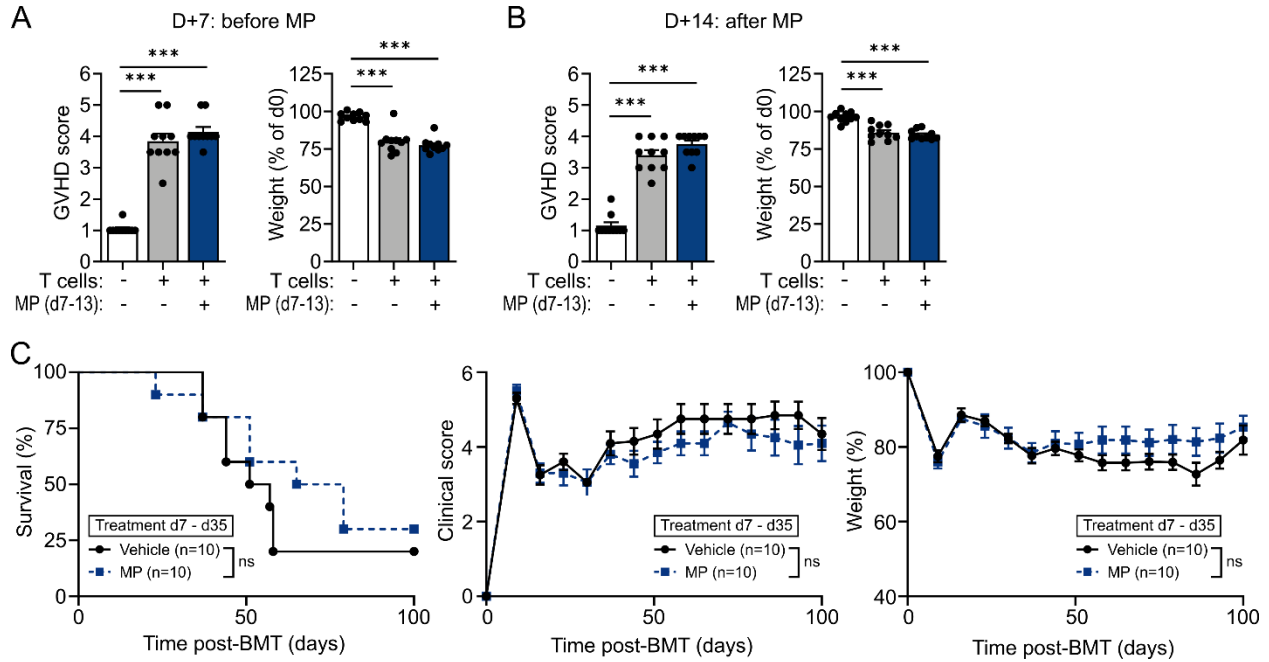

**Supplemental Figure 1. Systemic signs of GVHD after allo-BMT with or without corticosteroid treatment starting day 7 post-BMT.** (A-B) B6-into-BALB/c transplant of BM with or without T cells. Recipients were treated with methylprednisolone (MP; 2 mg/kg) or vehicle i.p. daily starting on day 7 after BMT. GVHD score and body weight, 7 and 14 days after BMT ( $n = 10$  mice per group). (C) Percentage survival, clinical score of GVHD, and relative weight of recipients in a B6-into-BALB/c transplant of BM and T cells with or without MP treatment (2 mg/kg, i.p. daily) from day 7 to 35 post-BMT ( $n = 10$  mice per group). Statistics performed with 1-way ANOVA (A and B) or log-rank analysis (C); NS, not significant;  $***P < 0.001$ . Data are combined from 2 experiments (A and B) or representative of at least 2 independent experiments (C).

## Supplemental Figure 2

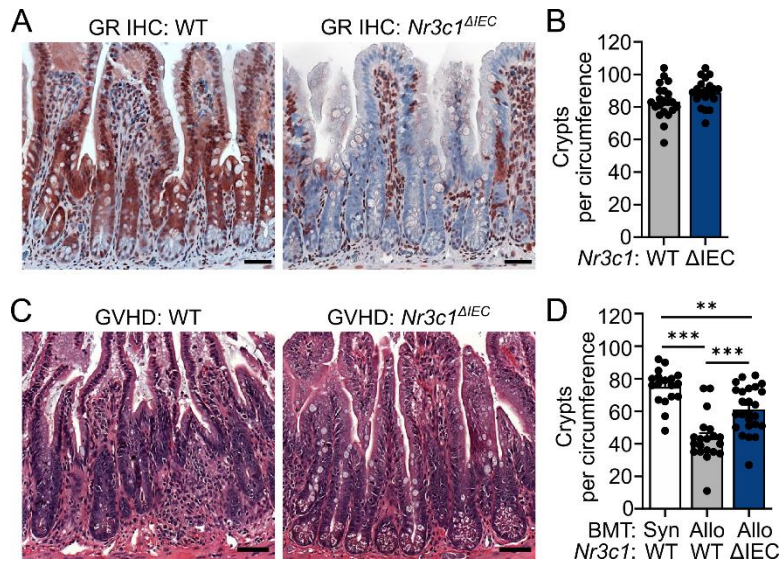

**Supplemental Figure 2. Intestinal epithelium-specific GR deletion reduces GVHD-associated intestinal injury.** (A-B) Representative glucocorticoid receptor (GR) IHC images and ileal crypt frequency of *Nr3c1*<sup>fl/fl</sup> *Olfm4-CreERT2* (*Nr3c1*<sup>ΔIEC</sup>) mice and WT littermates after tamoxifen treatment ( $n = 20-21$  sections per group). Scale bars: 50  $\mu\text{m}$ . (C-D) B10.BR-into-B6 transplant of syngeneic or allogeneic BM and T cells with WT and *Nr3c1*<sup>ΔIEC</sup> recipients. Representative images and ileal crypt frequency on day 14 post-BMT ( $n = 18-25$  sections per group). Scale bars: 50  $\mu\text{m}$ . Statistics performed with 2-sided  $t$  test or 1-way ANOVA; \*\* $P < 0.01$ , \*\*\* $P < 0.001$ . Data are combined from 2 experiments.

### Supplemental Figure 3

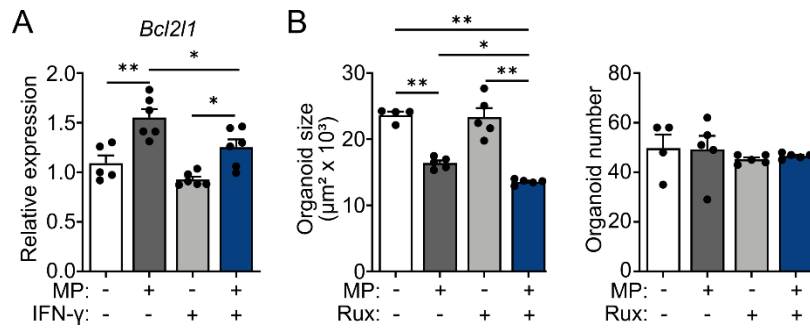

**Supplemental Figure 3. Ruxolitinib treatment does not prevent corticosteroid-mediated suppression of organoid growth.** (A) RT-qPCR of *Bcl211* in SI organoids cultured with or without MP (10  $\mu\text{M}$ ) and rmlFN- $\gamma$  (1 ng/ml) for 3 days ( $n = 5-6$  wells per group). (B) Size of SI organoids cultured with or without MP (10  $\mu\text{M}$ ) and ruxolitinib (10 nM) for 3 days ( $n = 4-5$  wells per group). Statistics performed with 1-way ANOVA; \* $P < 0.05$ , \*\* $P < 0.01$ . Data are representative of at least 2 independent experiments.

## Supplemental Figure 4

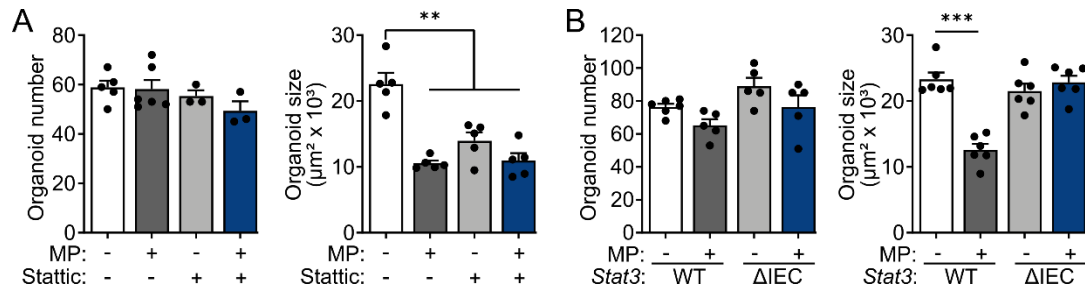

**Supplemental Figure 4. STAT3 inhibition during corticosteroid-mediated suppression of ex vivo organoid growth.** (A) Frequency and size of SI organoids cultured with or without MP (10  $\mu\text{M}$ ) and Stattic (50  $\mu\text{M}$ ) for 5 days ( $n = 3-6$  wells per group). (B) Frequency and size of *Stat3<sup>fl/fl</sup> Villin-Cre* (*Stat3 <sup>$\Delta\text{IEC}$</sup>* ) and WT SI organoids cultured with or without MP (10  $\mu\text{M}$ ) for 5 days ( $n = 5-6$  wells per group). Statistics performed with 1-way ANOVA; \*\* $P < 0.01$ , \*\*\* $P < 0.001$ . Data are representative of 2 independent experiments.

## Supplemental Figure 5

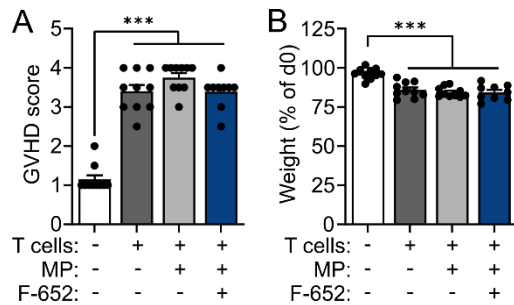

**Supplemental Figure 5. Systemic signs of GVHD after treatment with corticosteroids and F-652 starting day 7 post-BMT. (A-B)** B6-into-BALB/c transplant of BM with or without T cells. Recipients were treated with or without MP (2 mg/kg i.p. daily) and with or without F-652 (100 µg/kg s.c. every other day). Shown are the clinical GVHD score and body weight loss 14 days post-BMT ( $n = 9-10$  mice per group). Statistics performed with 1-way ANOVA; \*\*\* $P < 0.001$ . Data are combined from 2 independent experiments.
